# Supplementary material for: Short-Term Simulated Warming Changes the Beta Diversity of Bacteria in Taiga Forests’ Permafrost by Altering the Composition of Dominant Bacterial Phyla
Source: MDPI journal article supplement (doi:10.3390/f15040693), 2024-04-11
Supplement: s1 [file s1]

# Supplementary Materials

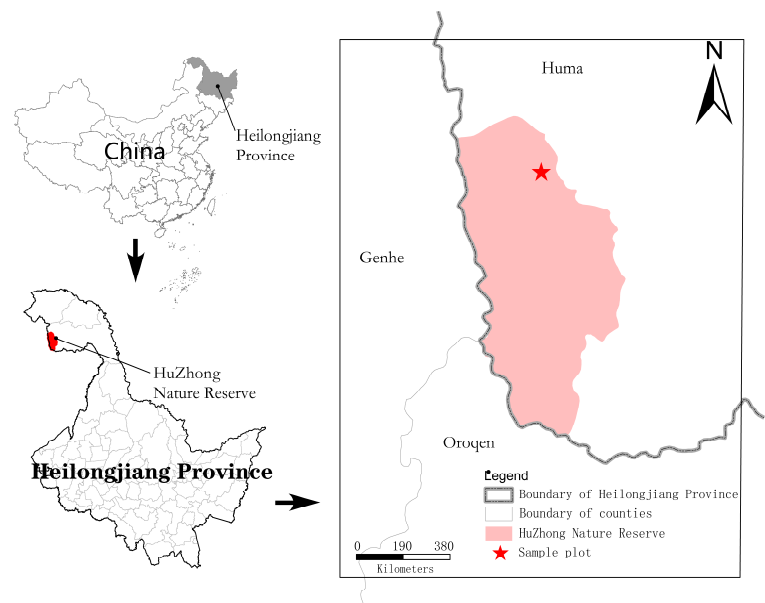

**Figure S1.** Map of the field sampling sites on the Greater Khingan Mountains.

**Table S1.** Soil physicochemical properties under different temperature treatments.

| Treatments     | TN (g/kg)     | SOC (g/kg)     | MBC (mg/kg)    | AN (mg/kg)     | AK (mg/kg)      | AP (mg/kg)     | pH           |
|----------------|---------------|----------------|----------------|----------------|-----------------|----------------|--------------|
| CK             | 2.60 ± 0.00 a | 61.72 ± 0.82 a | 50.77 ± 0.22 d | 82.72 ± 1.35a  | 129.15 ± 0.65 a | 80.13 ± 0.63 a | 4.58 ± 0.00a |
| T <sub>1</sub> | 2.51 ± 0.00 c | 60.06 ± 0.41 a | 73.00 ± 0.00 b | 77.99 ± 0.91b  | 116.35 ± 1.20 c | 79.83 ± 0.56 a | 4.52 ± 0.01b |
| T <sub>2</sub> | 2.58 ± 0.00 a | 60.92 ± 0.00 a | 75.60 ± 0.00 a | 79.80 ± 1.65ab | 121.82 ± 1.18 b | 82.12 ± 0.43 a | 4.50 ± 0.00c |
| T <sub>3</sub> | 2.54 ± 0.01 b | 59.78 ± 0.87 a | 68.40 ± 0.15 c | 76.83 ± 0.71b  | 123.44 ± 0.81 b | 81.52 ± 1.21 a | 4.46 ± 0.00d |

Data were mean ± standard error (*n* = 3); different lowercase letters in the same column indicate significant differences (*p* < 0.05).

**Table S2.** Relative abundance (>1%) of potential functional pathways at level 2 in different treatments.

| Pathway Level 1                      | Pathway Level 2                           | CK             | T <sub>1</sub>  | T <sub>2</sub>  | T <sub>3</sub>  |
|--------------------------------------|-------------------------------------------|----------------|-----------------|-----------------|-----------------|
| Metabolism                           | Carbohydrate metabolism                   | 12.22 ± 0.48 b | 13.24 ± 0.62 ab | 13.66 ± 0.09 a  | 13.53 ± 0.03 ab |
|                                      | Lipid metabolism                          | 3.98 ± 0.09 a  | 3.80 ± 0.15 ab  | 3.67 ± 0.03 b   | 3.72 ± 0.01 ab  |
|                                      | Metabolism of cofactors and vitamins      | 7.90 ± 0.42 a  | 7.26 ± 0.52 a   | 6.92 ± 0.07 a   | 7.14 ± 0.04 a   |
|                                      | Energy metabolism                         | 8.40 ± 0.72 a  | 7.42 ± 0.76 a   | 6.76 ± 0.07 a   | 6.76 ± 0.06 a   |
|                                      | Nucleotide metabolism                     | 5.14 ± 0.07 a  | 4.98 ± 0.10 ab  | 4.91 ± 0.03 b   | 4.91 ± 0.01 b   |
|                                      | Amino acid metabolism                     | 11.94 ± 0.51 b | 11.68 ± 0.23 b  | 12.43 ± 0.18 ab | 12.94 ± 0.03 a  |
|                                      | Metabolism of terpenoids and polyketides  | 3.03 ± 0.15 a  | 2.90 ± 0.15 a   | 2.76 ± 0.04 a   | 2.70 ± 0.02 a   |
|                                      | Xenobiotics biodegradation and metabolism | 3.97 ± 0.31 b  | 3.83 ± 0.25 b   | 4.47 ± 0.17 ab  | 4.93 ± 0.04 a   |
|                                      | Metabolism of other amino acids           | 2.72 ± 0.09 c  | 2.81 ± 0.09 bc  | 2.98 ± 0.08 b   | 3.24 ± 0.00 a   |
|                                      | Glycan biosynthesis and metabolism        | 2.45 ± 0.04 b  | 2.51 ± 0.01 ab  | 2.42 ± 0.05 b   | 2.60 ± 0.00 a   |
| Genetic Information Processing       | Translation                               | 4.47 ± 0.17 a  | 3.99 ± 0.28 a   | 3.93 ± 0.11 a   | 4.17 ± 0.02 a   |
|                                      | Folding, sorting and degradation          | 2.38 ± 0.12 a  | 2.22 ± 0.14 a   | 2.10 ± 0.02 a   | 2.15 ± 0.01 a   |
| Environmental Information Processing | Replication and repair                    | 4.09 ± 0.13 a  | 3.86 ± 0.16 a   | 3.74 ± 0.04 a   | 3.80 ± 0.02 a   |
|                                      | Membrane transport                        | 9.66 ± 0.94 a  | 10.28 ± 0.76 a  | 10.88 ± 0.97 a  | 8.23 ± 0.18 a   |
|                                      | Signal transduction                       | 8.55 ± 0.52 a  | 9.15 ± 0.24 a   | 8.29 ± 0.21 a   | 8.49 ± 0.01 a   |
| Cellular Processes                   | Cell motility                             | 2.56 ± 0.20 b  | 2.82 ± 0.05 ab  | 2.72 ± 0.11 ab  | 3.01 ± 0.01 a   |
|                                      | Cell growth and death                     | 2.03 ± 0.14 ab | 1.82 ± 0.11 b   | 1.84 ± 0.10 b   | 2.20 ± 0.00 a   |
| Human Diseases                       | Infectious disease: bacterial             | 1.34 ± 0.15 b  | 1.98 ± 0.27 a   | 1.66 ± 0.17 ab  | 1.08 ± 0.01 b   |

Data were mean ± standard error (*n* = 3), different lowercase letters in the same row indicate significant differences (*p* < 0.05).

**Table S3.** Network diagram data.

| Source: Bacterial Phyla | Target: Functional Pathways at Level 2    | Correction | <i>p</i> |
|-------------------------|-------------------------------------------|------------|----------|
| others                  | Cell motility                             | -0.90      | <0.01    |
| others                  | Glycan biosynthesis and metabolism        | -0.76      | <0.01    |
| Patescibacteria         | Amino acid metabolism                     | -0.73      | 0.01     |
| Patescibacteria         | Glycan biosynthesis and metabolism        | -0.73      | 0.01     |
| Firmicutes              | Membrane transport                        | -0.73      | 0.01     |
| Patescibacteria         | Metabolism of other amino acids           | -0.71      | 0.01     |
| Patescibacteria         | Xenobiotics biodegradation and metabolism | -0.69      | 0.01     |
| Acidobacteriota         | Signal transduction                       | -0.68      | 0.01     |
| Actinobacteriota        | Metabolism of other amino acids           | -0.65      | 0.02     |
| Verrucomicrobiota       | Signal transduction                       | -0.63      | 0.03     |
| Proteobacteria          | Energy metabolism                         | -0.62      | 0.03     |
| Proteobacteria          | Nucleotide metabolism                     | -0.62      | 0.03     |
| Firmicutes              | Infectious disease bacterial              | -0.62      | 0.03     |
| Firmicutes              | Glycan biosynthesis and metabolism        | 0.62       | 0.03     |
| Actinobacteriota        | Lipid metabolism                          | 0.63       | 0.03     |
| Desulfobacterota        | Cell motility                             | 0.65       | 0.02     |
| Acidobacteriota         | Amino acid metabolism                     | 0.67       | 0.02     |
| Proteobacteria          | Cell motility                             | 0.67       | 0.02     |

Source represents the bacterial phyla, which is the starting point of the line of connection. Target represents functional pathways at level 2, which is the endpoint of the line of connection. The absolute values of correlation were used as a measure for the thickness of the lines in Figure 6. Correction represents the positive or negative correlation, -1 represents the negative correlation, and 1 represents the positive correlation.
